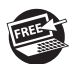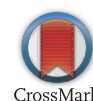

COMMENT ON EVERT ET AL.

# Nutrition Therapy Recommendations for the Management of Adults With Diabetes.

## Diabetes Care 2013;36:3821–3842

Diabetes Care 2014;37:e101 | DOI: 10.2337/dc13-2854

Meghan Anne Jardine, Caroline Trapp, and Susan Levin

We read the position statement on nutrition therapy with great interest (1). In our observation, the article appears to have missed some of the major benefits of a whole-foods, plant-based diet, also referred to as a vegan or vegetarian dietary pattern.

The article states that, in a review of six vegetarian and low-fat vegan studies, there was not a consistent improvement in glycemic control or cardiovascular disease risk factors “except when energy intake was restricted and weight was lost.” In fact, all but one of the five vegan intervention studies cited encouraged ad libitum intake of whole grains, legumes, vegetables, and fruit. Participants achieved weight loss and A1C reduction without having to count carbohydrates or consciously limit portions. The sixth study was a population study of over 60,000 participants (Adventist Health Study-2) where those in the vegan and vegetarian groups were found to have a prevalence of type 2 diabetes of 2.9% and 3.2%, respectively. The protection from type 2 diabetes was observed even after correcting for several lifestyle factors, including BMI.

In addition to causing weight loss and glycemic control, vegan and vegetarian dietary patterns also lower blood pressure and improve cholesterol (2). If a medication did all those things, it would

be the pharmacological advance of the century.

Cardiovascular disease is still the number one cause of death for people who have diabetes. Ornish et al. (3) demonstrated reversal of coronary atherosclerotic plaques in people with severe coronary artery disease in the Lifestyle Heart Trial not with medications or invasive procedures but with a low-fat, whole-foods vegetarian diet. Medicare reimburses certified sites that provide this type of education to patients with cardiovascular disease.

Furthermore, there is a growing body of research linking red and processed meats to a variety of health problems including type 2 diabetes. Participants from the Health Professionals Study, the Nurses’ Health Study I, and the Nurses’ Health Study II who increased their red meat intake by a half serving a day increased their risk of type 2 diabetes by 48% in a 4-year period (4).

People who have type 2 diabetes should receive education on plant-based nutrition as an option for managing their diabetes. They will not have to count carbohydrates or calories. They will enjoy a lot of delicious foods, lose weight, lower their blood pressure and cholesterol, and may even be able to reduce their medications. There are great resources available for health

care providers to educate their patients on this way of eating (5). It is also well established that this type of eating pattern is healthful and adequate (2). The position statement missed the opportunity to provide this information, which has been well documented in the literature.

**Acknowledgments.** The authors acknowledge Neal Barnard and Carrie Clyne of the Physicians Committee for Responsible Medicine for their review of the manuscript.

**Duality of Interest.** No potential conflicts of interest relevant to this article were reported.

### References

1. Evert AB, Boucher JL, Cypress M, et al. Nutrition therapy recommendations for the management of adults with diabetes. *Diabetes Care* 2013;36:3821–3842
2. Craig WJ, Mangels AR; American Dietetic Association. Position of the American Dietetic Association: vegetarian diets. *J Am Diet Assoc* 2009;109:1266–1282
3. Ornish D, Scherwitz LW, Billings JH, et al. Intensive lifestyle changes for reversal of coronary heart disease. *JAMA* 1998;280:2001–2007
4. Pan A, Sun Q, Bernstein AM, Manson JE, Willett WC, Hu FB. Changes in red meat consumption and subsequent risk of type 2 diabetes mellitus: three cohorts of US men and women. *JAMA Intern Med* 2013;173:1328–1335
5. Trapp C, Levin S. Preparing to prescribe plant-based diets for diabetes prevention and treatment. *Diabetes Spectrum* 2012;25:38–44
